# Supplementary material
Source: MDPI journal article supplement (https://www.mdpi.com/1999-4907/11/2/160)
Supplement: s1 [file s1]

## Supplementary Materials

**Table S1.** Sum of microquadrats (a) and sites (b) considering the two main effects of landscape heterogeneity, gap/forest environment and their interaction.

(a)

| Gap/forest environment  |        |       |        |       |       |
|-------------------------|--------|-------|--------|-------|-------|
| Landscape heterogeneity | Forest | Small | Medium | Large | Total |
| Homogenous              | 144    | 54    | 80     | 92    | 370   |
| Moderate                | 144    | 48    | 82     | 93    | 367   |
| Heterogeneous           | 143    | 55    | 72     | 94    | 364   |
| Total                   | 431    | 157   | 234    | 279   | 1101  |

(b)

| Gap/forest environment  |        |       |        |       |       |
|-------------------------|--------|-------|--------|-------|-------|
| Landscape heterogeneity | Forest | Small | Medium | Large | Total |
| Homogenous              | 36     | 13    | 13     | 12    | 74    |
| Moderate                | 36     | 12    | 15     | 12    | 75    |
| Heterogeneous           | 36     | 14    | 12     | 12    | 74    |
| Total                   | 108    | 39    | 40     | 36    | 223   |

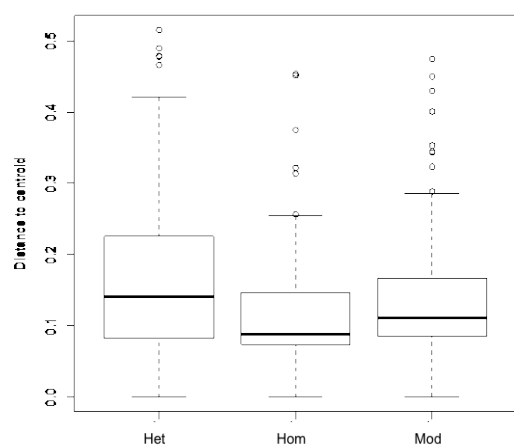

(a) Shrub/Forest understory

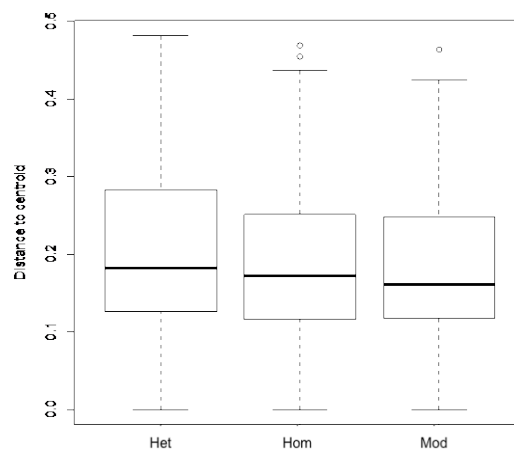

(b) Shrub/Large gaps

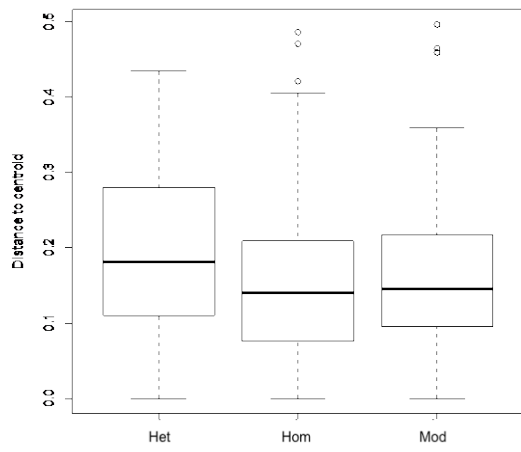

**(c)** Shrub/Medium gaps

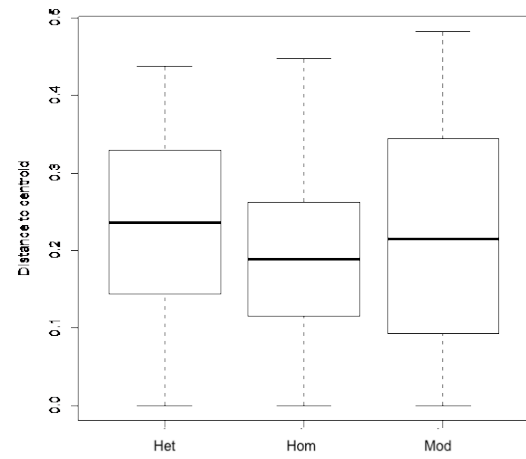

**(d)** Shrub/Small gaps

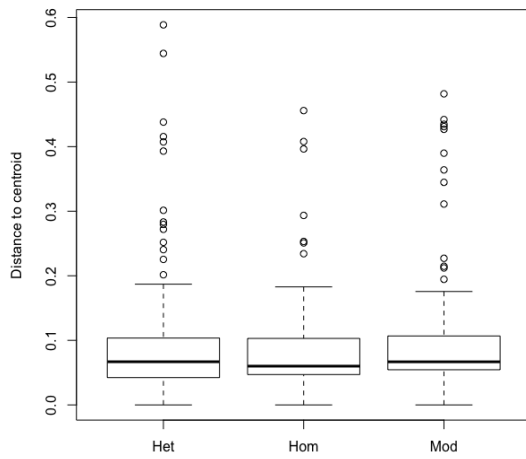

**(e)** Tree seedling/Forest understory

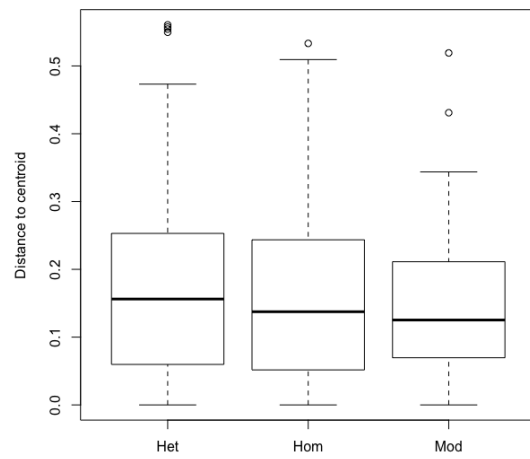

**(f)** Tree seedling/Large gaps

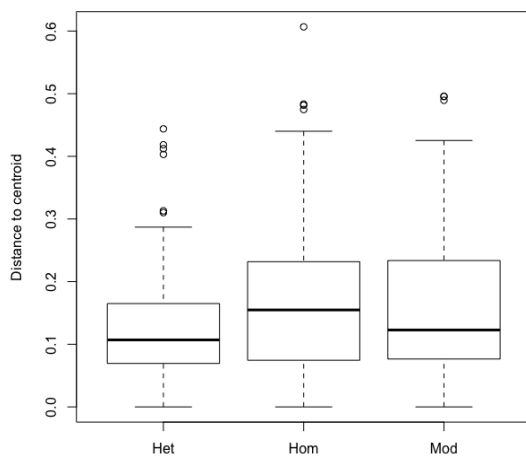

**(g)** Tree seedling/Medium gaps

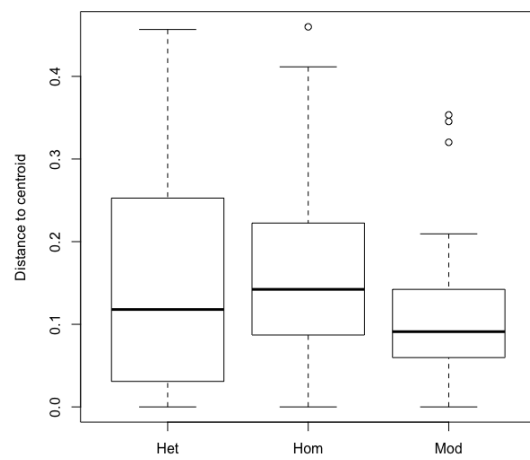

**(h)** Tree seedling/Small gaps

**Figure S1.** Box-plot of the multivariate distance to the spatial mean (centroid) for shrub (a to d) and tree seedling (e to h) species groups in landscapes of different heterogeneity levels (heterogeneous (Het), moderate (Mod), homogenous (Hom)) for different gap/forest environments (forest (F) understory, small (S) gaps, medium (M) gaps, large (L) gaps).

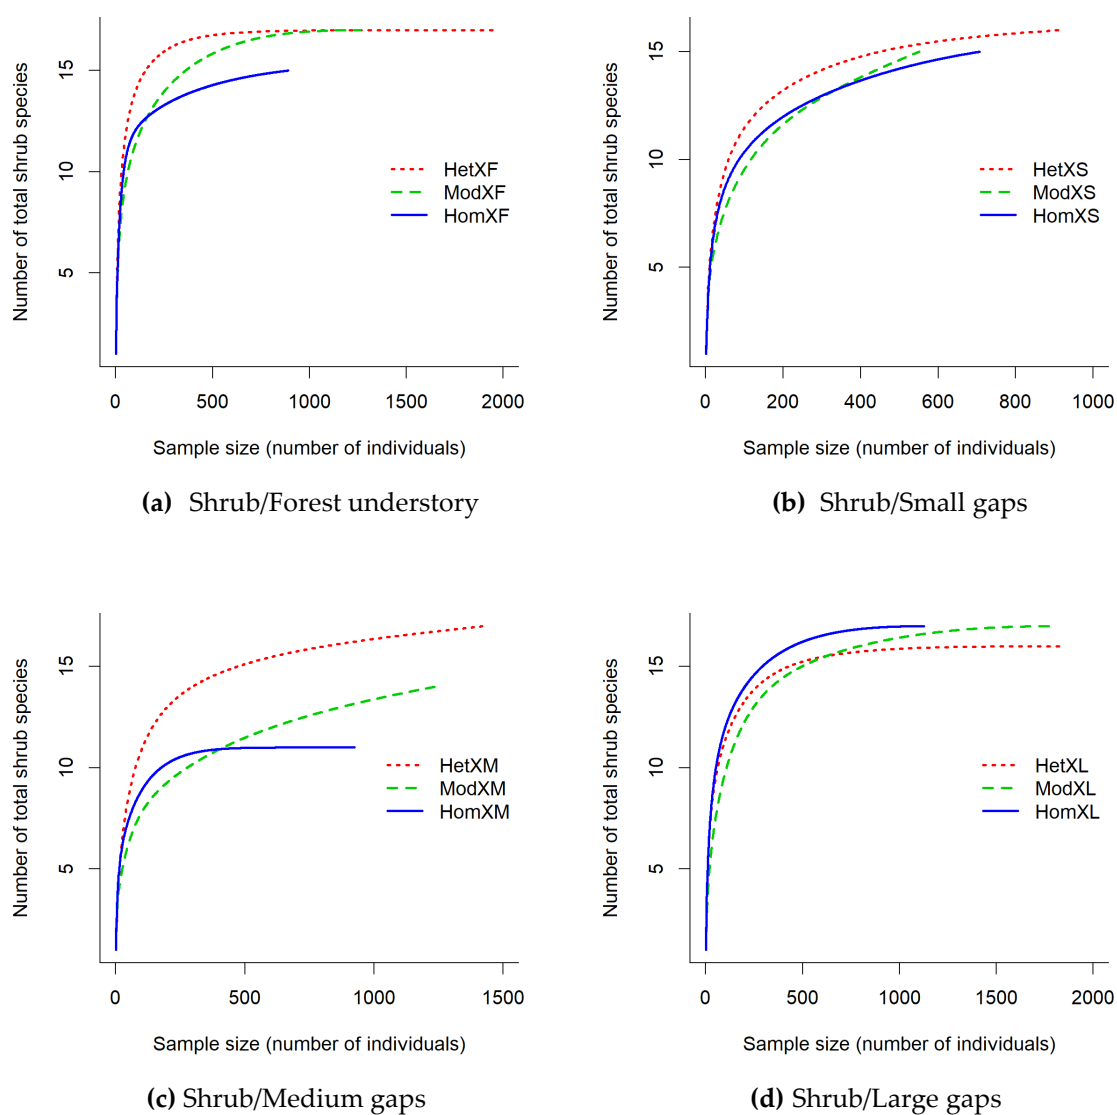

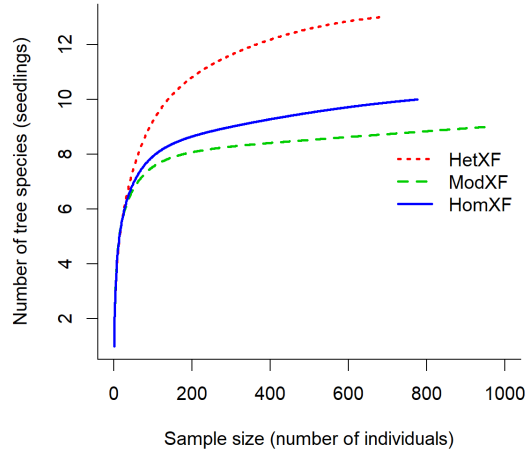

(e) Tree seedling/Forest understory

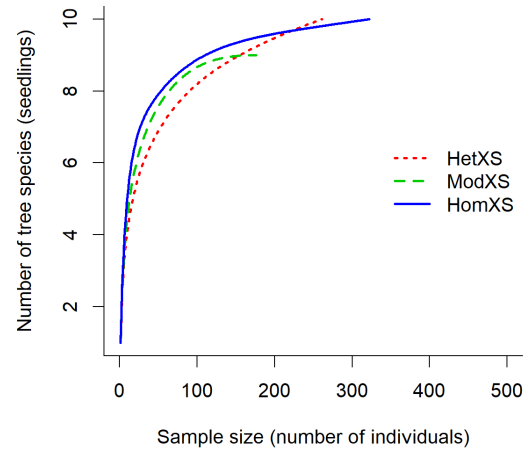

(f) Tree seedling/Small gaps

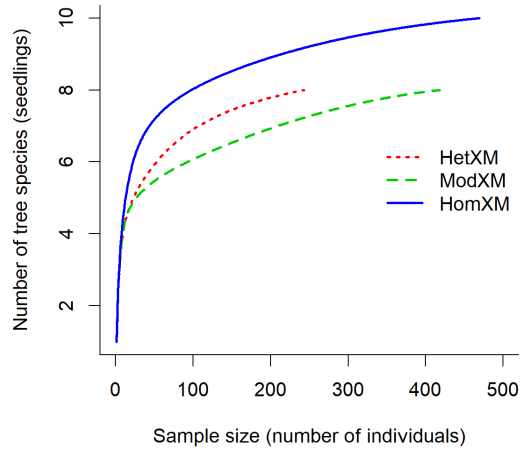

(g) Tree seedling/Medium gaps

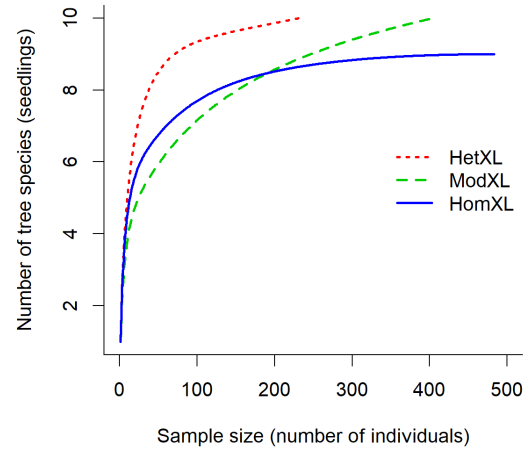

(h) Tree seedling/Large gaps

**Figure S2.** Species rarefaction curves from landscapes with different spatial heterogeneity levels (heterogeneous (Het), moderate (Mod), homogenous (Hom)) in four distinct gap/forest environments (forest (F) understory, small (S) gaps, medium (M) gaps, large (L) gaps) for shrub (a to d) and tree seedling (e to h) species.

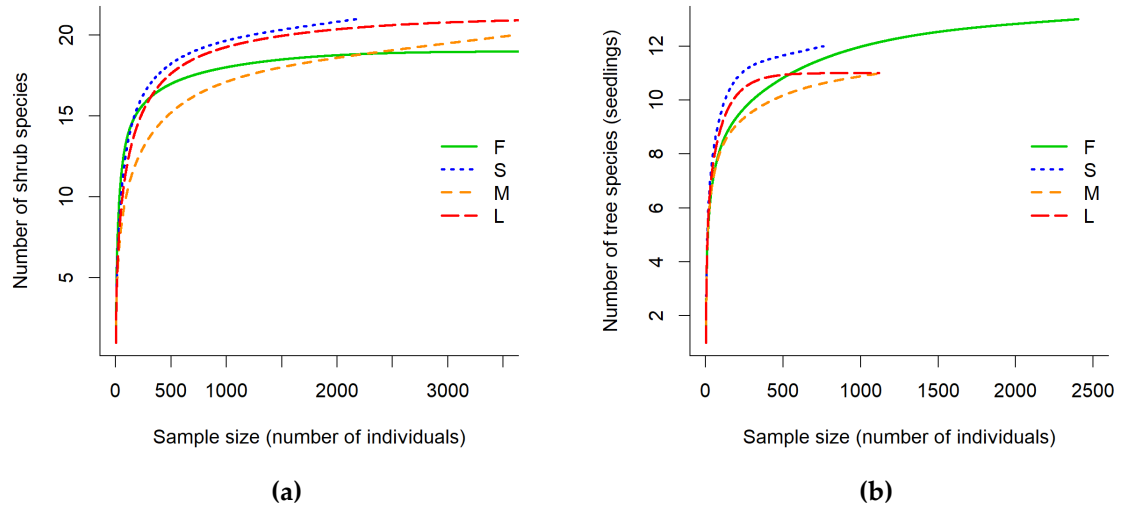

**Figure S3.** Species rarefaction curves from four distinct gap/forest environments (forest (F) understory, small (S) gaps, medium (M) gaps, large (L) gaps) for shrub (a) and tree seedling (b) species.
